# Supplementary material
Source: PubMed Central journal article supplement (PMC6133724)
Supplement: NIHMS1502185-supplement-3.pdf [file NIHMS1502185-supplement-3.pdf]

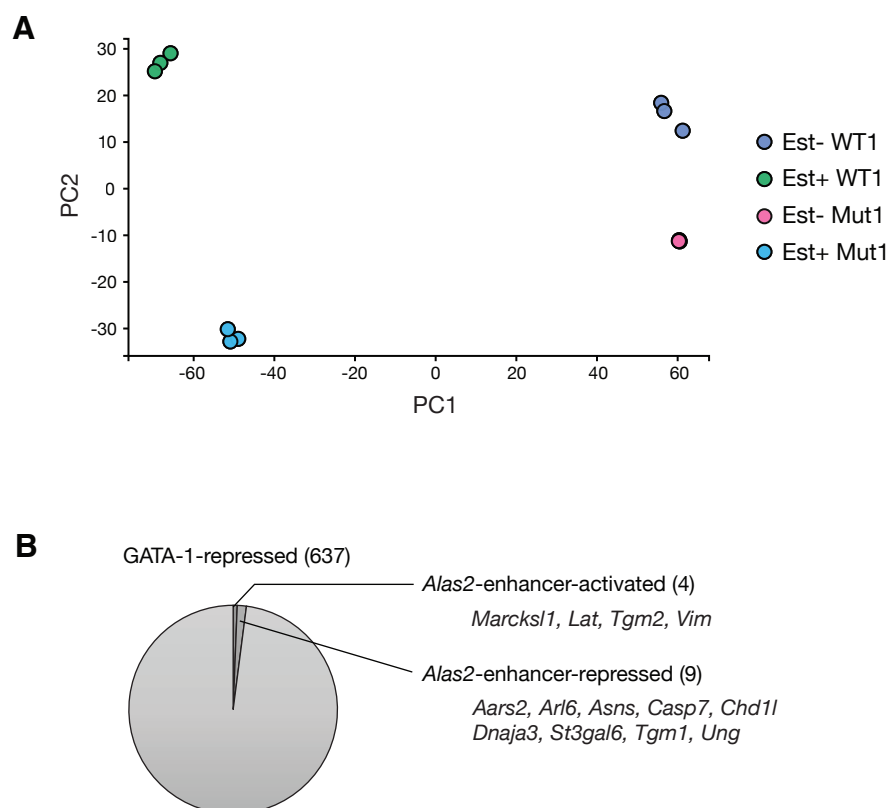

**Figure S1. Principle component analysis of the proteomes and GATA-1/*Alas2*-enhancer-repressed mRNAs/proteins, Related to Figure 1.**

(A) Principle component analysis of untreated and  $\beta$ -estradiol-treated WT and double-mutant G1E-ER-GATA-1 cell proteomes ( $n = 3$  biological replicates).

(B) GATA-1-repressed mRNAs and proteins, also regulated by *Alas2*-enhancer, detected by RNA-seq and proteomics.

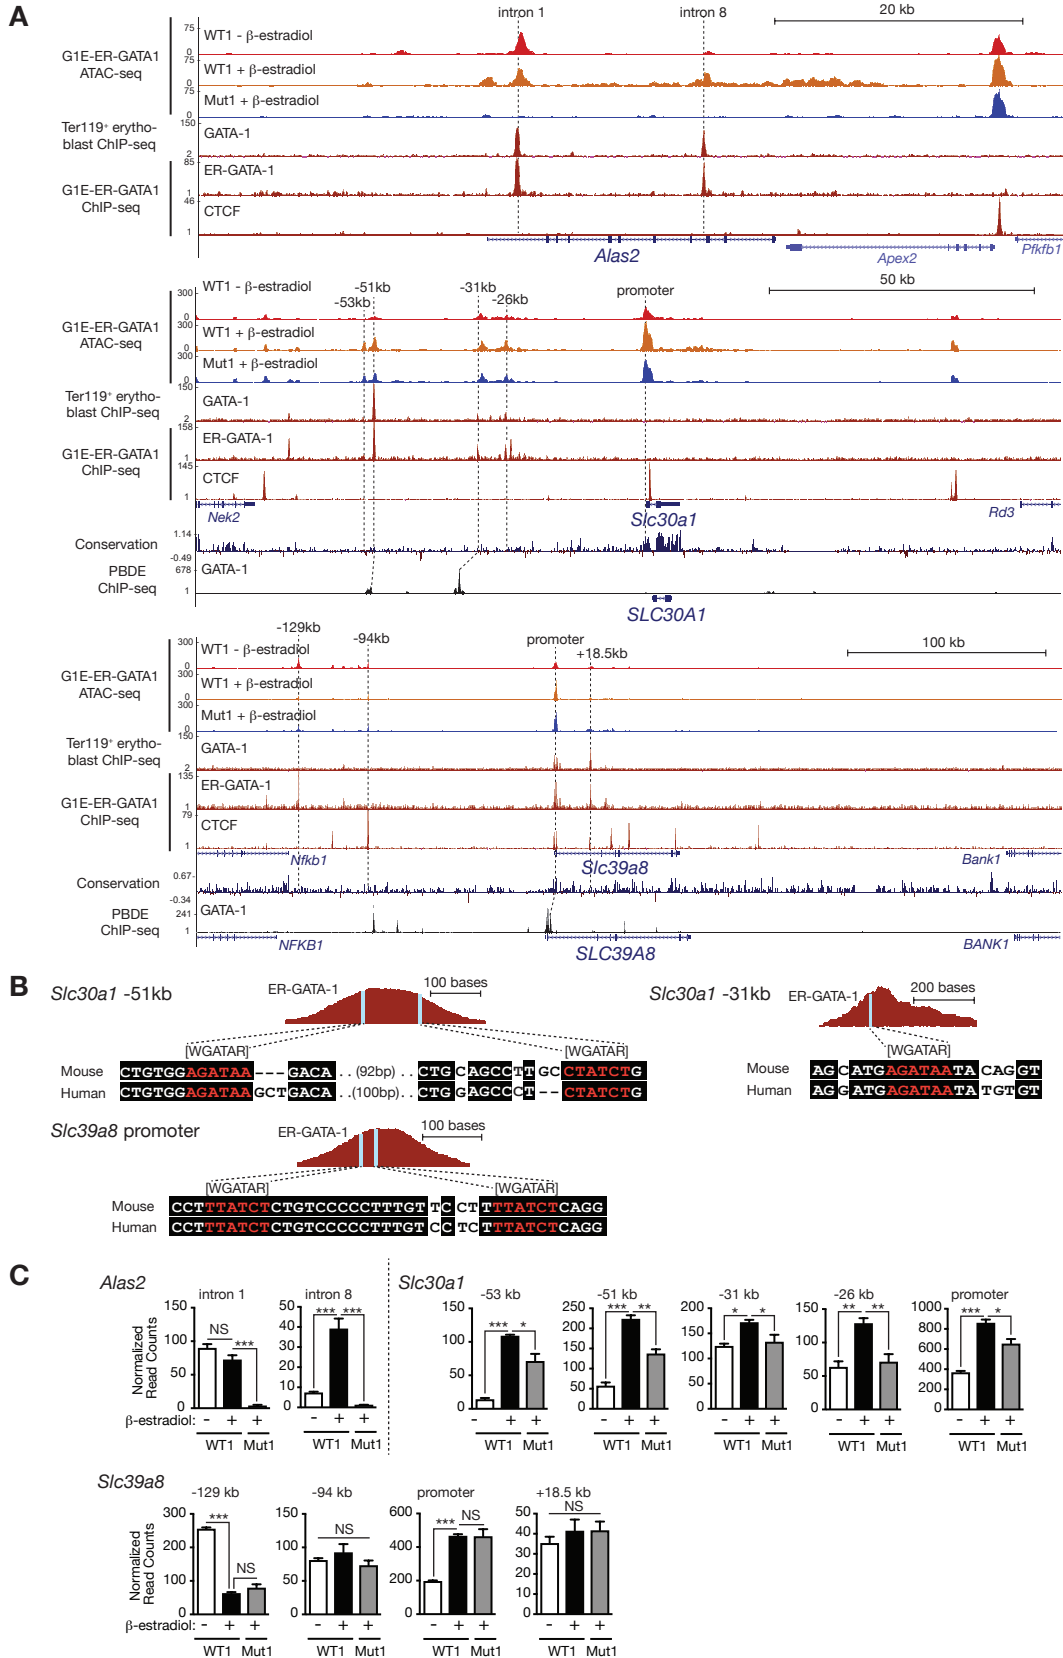

**Figure S2. Mechanistic dissection of GATA-1/heme-regulated gene expression, Related to Figure 2.**

(A) ATAC-seq profiles of untreated WT1 and  $\beta$ -estradiol-treated WT1 and *Alas2* intronic double-mutant cells and GATA-1 ChIP-seq profiles at *Alas2*, *Slc30a1*, and *Slc39a8*.

(B) Conserved GATA motifs in GATA-1 ChIP-seq peaks.

(C) Normalized ATAC-seq read counts.

P values were calculated by one-way ANOVA, followed by Dunnett's test (n = 3 biol. reps., mean +/- SE).

\*P < 0.05, \*\*P < 0.01, \*\*\*P < 0.001, NS: not significant

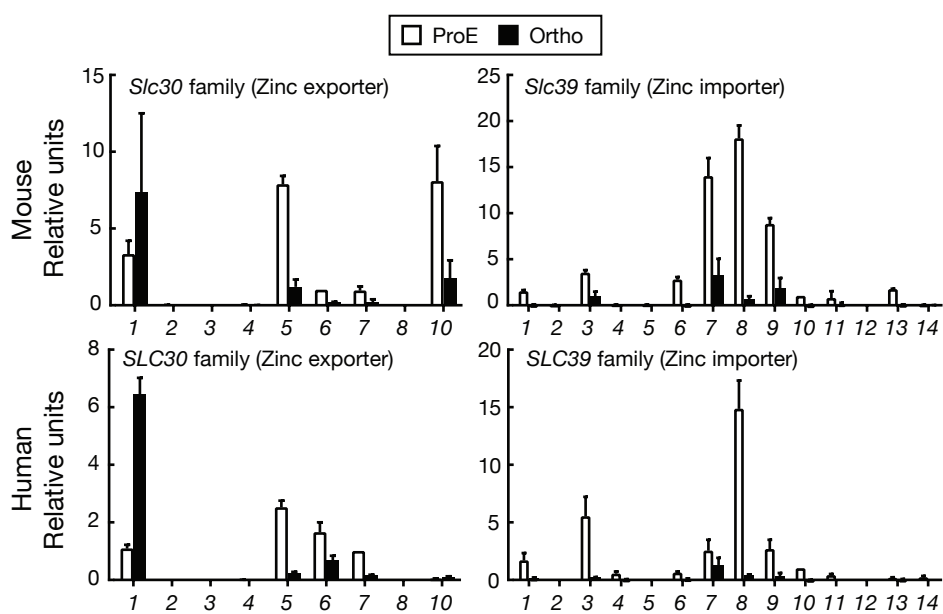

**Figure S3. Expression levels of all *Slc30* (zinc exporter) and *Slc39* (zinc importer) family members in mouse and human proerythroblasts and orthochromatic erythroblasts, Related to Figure 3.**

Published RNA-seq data was re-analyzed (An et al., 2014).

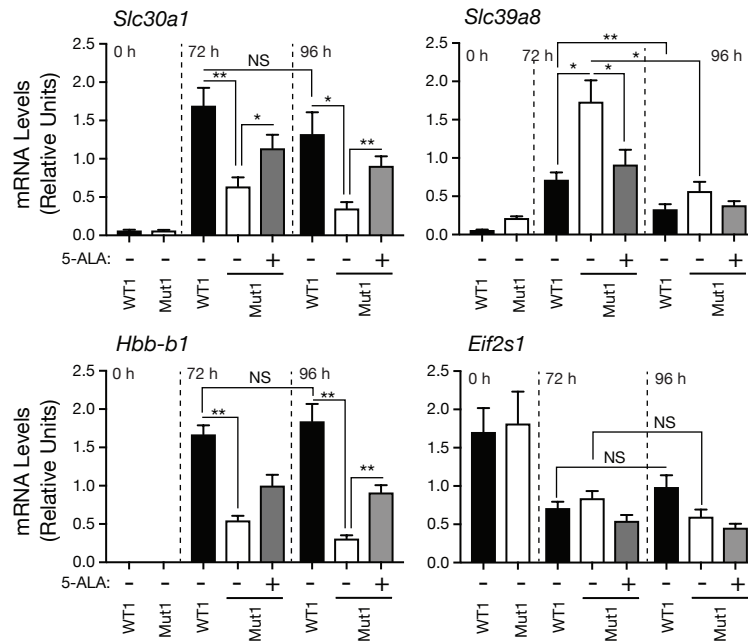

**Figure S4. *Slc39a8* downregulation during erythroid maturation of wild type and *Alas2* enhancer mutant G1E-ER-GATA-1 cells, Related to Figure 3.**

Real-time RT-PCR analysis of mRNA levels of *Slc30a1*, *Slc39a8*, *Hbb-b1*, and *Eif2s1* in WT and double mutant G1E-ER-GATA-1 cells ( $n = 6$  biological replicates from three independent experiments, mean  $\pm$  SE).  $P$  values were calculated by repeated-measures one-way ANOVA, followed by Tukey's test. \* $P < 0.05$ , \*\* $P < 0.01$ , NS: not significant.



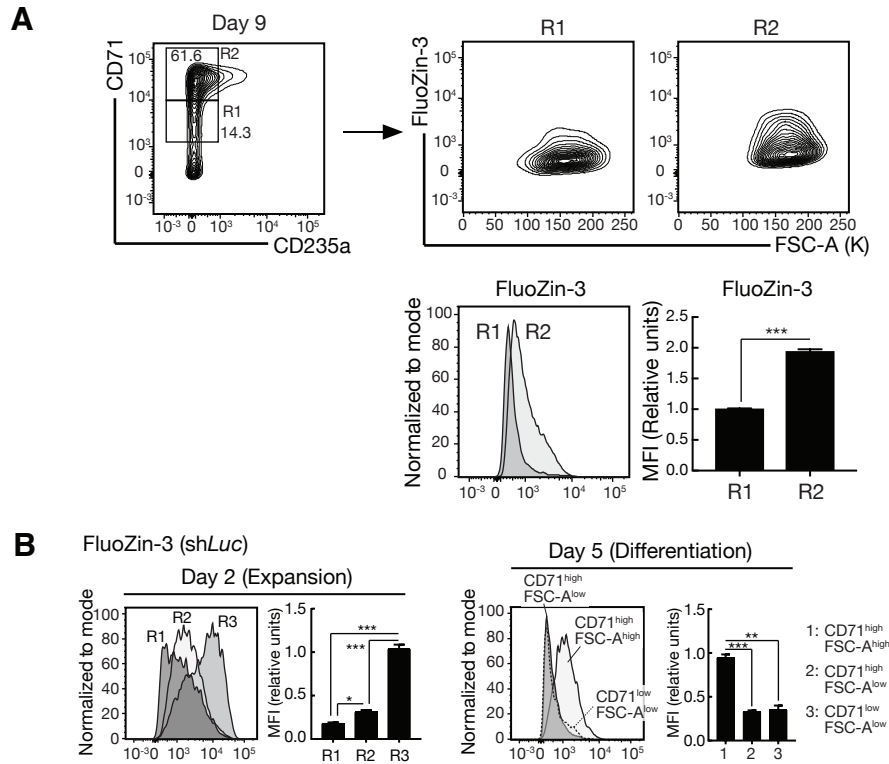

**Figure S5. Increased and decreased intracellular zinc during cultured primary human and mouse erythroblast maturation, Related to Figures 4 and 6.**

(A) Increased intracellular zinc during initial phases of primary human erythroblast maturation. Representative flow cytometric plots of CD71 and CD235a from differentiated human mononuclear cells from G-CSF-mobilized peripheral blood at day 9 are shown. Representative flow cytometric plots of FluoZin-3 and FSC-A and histograms of FluoZin-3 in each population are shown. FluoZin-3 MFI in each population was quantified ( $n = 4$  biological replicates from two independent experiments, mean  $\pm$  SE).  $P$  values were calculated by paired two-tailed t-test. \*\*\*  $P < 0.001$ .

(B) Increased and decreased intracellular zinc during cultured murine erythroblast maturation. Representative histograms of FluoZin-3 in each population are shown. FluoZin-3 MFI in each population was quantified ( $n = 4$  biological replicates from two independent experiments, mean  $\pm$  SE).  $P$  values were calculated by repeated-measures one-way ANOVA followed by Tukey's test. \* $P < 0.05$ , \*\* $P < 0.01$ ; \*\*\* $P < 0.001$ .

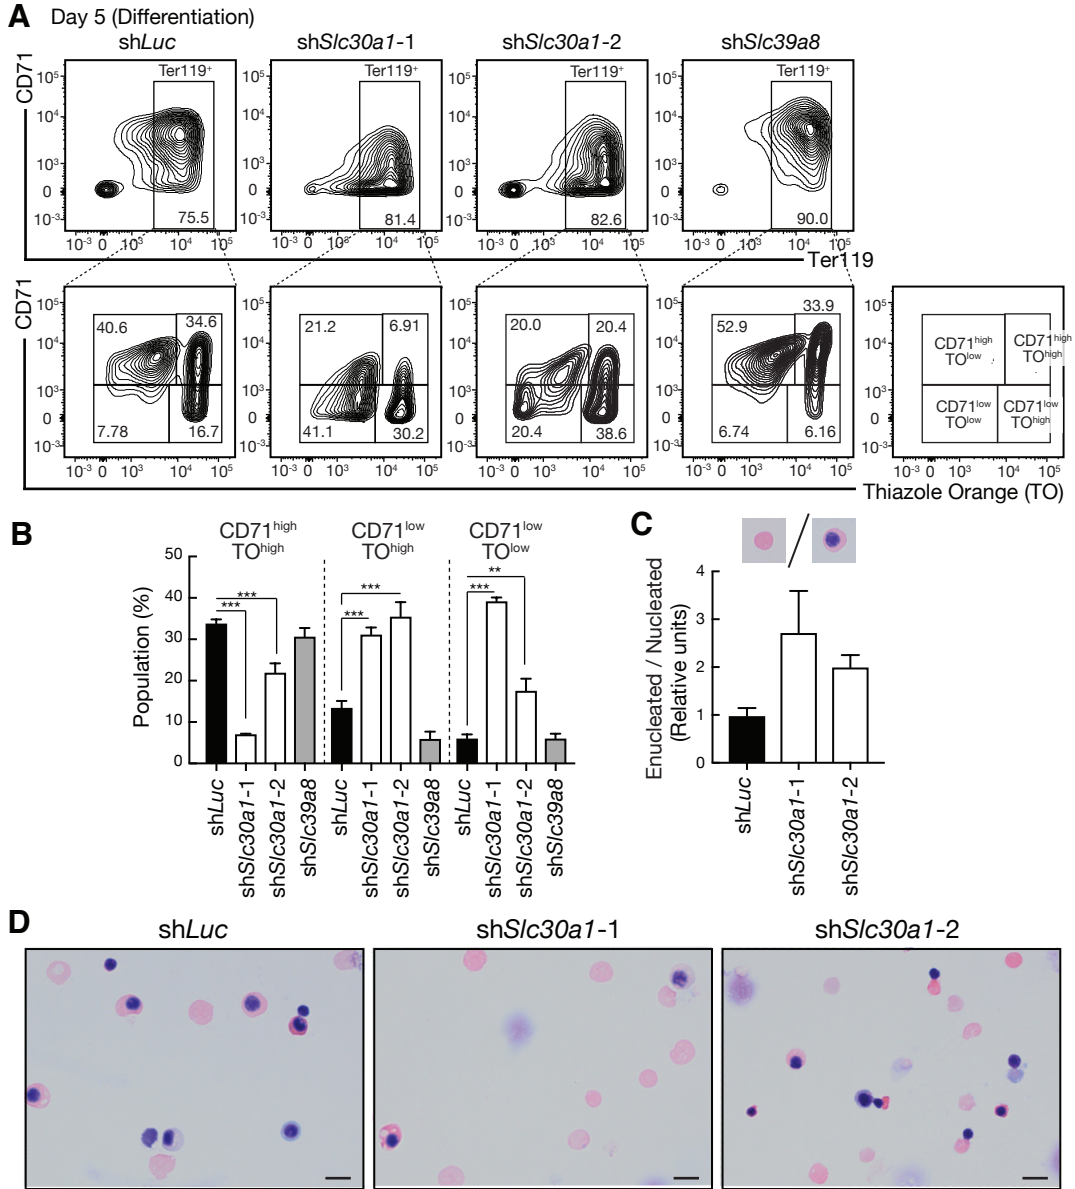

**Figure S6. Intracellular zinc as a determinant of terminal differentiation, Related to Figure 6.**

(A) Representative flow cytometric plots of CD71, Ter119, and thiazole orange (TO) in *Slc30a1*- or *Slc39a8*-knockdown lineage-negative hematopoietic precursors expanded for 2 days and then differentiated for 3 days.

(B) The percentage of CD71<sup>high</sup>TO<sup>high</sup>, CD71<sup>low</sup>TO<sup>high</sup>, and CD71<sup>low</sup>TO<sup>low</sup> populations in control and *Slc30a1*- or *Slc39a8*-knockdown cells. *P* values were calculated by one-way ANOVA, followed by Dunnett's test (*n* = 4 biological replicates from two independent experiments, mean ± SE). \*\**P* < 0.01, \*\*\**P* < 0.001.

(C) The ratios of enucleated cell numbers divided by nucleated cell numbers in control and *Slc30a1*-knockdown cells (*n* = 2 biological replicates from one experiment, mean ± SD).

(D) Representative photomicrographs of Wright-Giemsa staining of control and *Slc30a1*-knockdown cells. Scale bar, 10 μm.

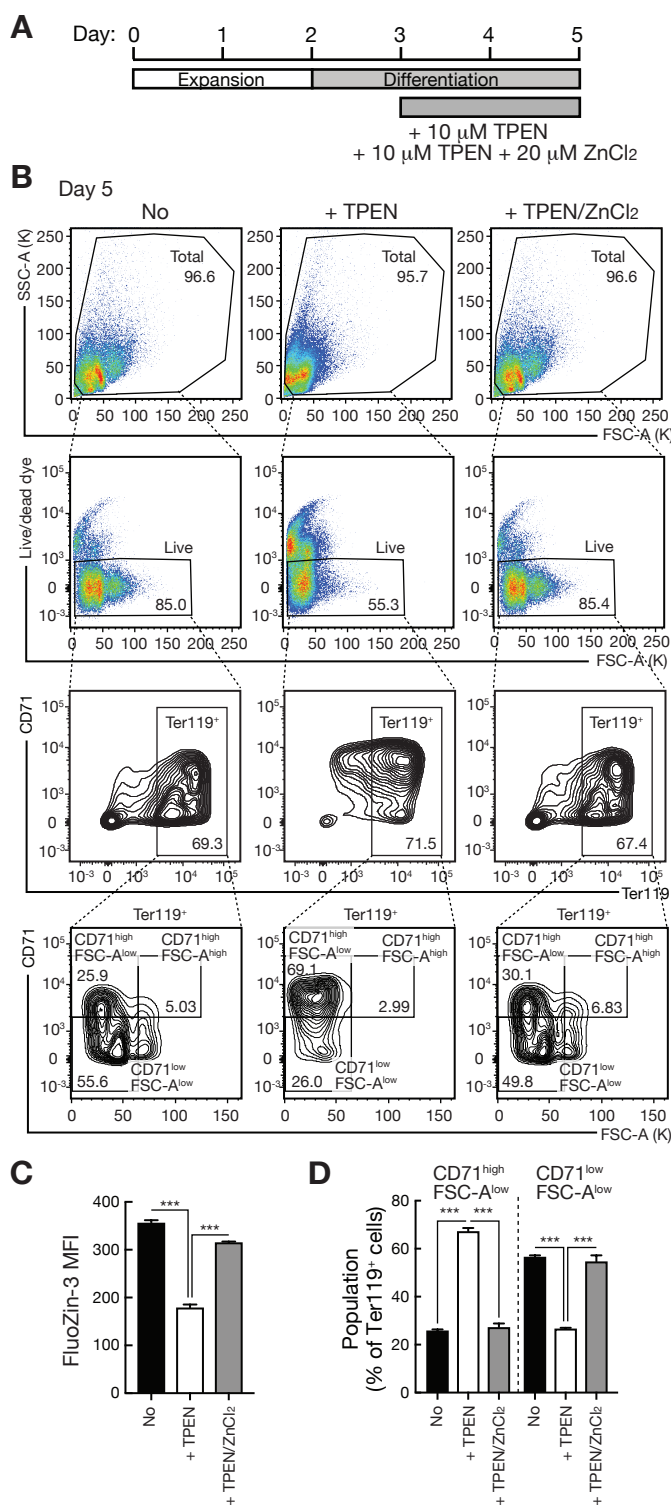

**Figure S7. Reducing intracellular zinc restricts terminal differentiation, Related to Figure 6.**

(A) Schematic of the experiments using the zinc chelator TPEN and ZnCl<sub>2</sub>.

(B) Representative flow cytometric plots of FSC-A, SSC-A, Live/dead dye, CD71, and Ter119 at day 5.

(C) Quantitation of FluoZin-3 MFI in live populations of untreated and TPEN- or TPEN/ZnCl<sub>2</sub>-treated cells. *P* values were calculated by one-way ANOVA followed by Tukey's test (*n* = 3 biological replicates from one experiment, mean  $\pm$  SE). \*\*\* *P* < 0.001.

(D) The percentage of CD71<sup>high</sup>FSC-A<sup>low</sup> and CD71<sup>low</sup>FSC-A<sup>low</sup> populations in untreated and TPEN- or TPEN/ZnCl<sub>2</sub>-treated cells. *P* values were calculated by one-way ANOVA followed by Tukey's test (*n* = 3 biological replicates from one experiment, mean  $\pm$  SE). \*\*\* *P* < 0.001.

**Table S3. Primers for qRT-PCR and oligonucleotides for construction of shRNA plasmids, Related to STAR Methods.**

**A**

| Primers for qRT-PCR | Species     | Sequence (5'→ 3')                                  |
|---------------------|-------------|----------------------------------------------------|
| <i>Slc30a1</i>      | mouse       | caacaccagcaattccaacg<br>tgtcagactcctggatgagattc    |
| <i>Slc39a8</i>      | mouse       | gccagctgcacttcaacca<br>agagaagttcgagctggttatctg    |
| <i>Hbb-b1</i>       | mouse       | ttaacgatggcctgaatcactt<br>cagcacaatcacgatcataattgc |
| 18s                 | mouse/human | cgccgctagaggtgaaattct<br>cgaacctccgacttctgtct      |
| <i>HBB</i>          | human       | tctgaggagaagtctgccgt<br>ggagtgacagatcccaaaag       |
| <i>HBA-1</i>        | human       | gggtggacccggtcaactt<br>gaggtgggaggccagggt          |
| <i>SLC30A1</i>      | human       | ccaataccagcaactccaacg<br>tactccactgtatcaccacttctg  |
| <i>SLC39A8</i>      | human       | gccagctgcacttcaacca<br>gtaagactgctggacagatgacag    |
| <i>ACTB</i>         | human       | ggccaaccgagaagat<br>ccagaggcgtacaggatagc           |

**B**

| shRNA               | Clone ID<br>(GE Dharmacon) | Sequence (5'→ 3') of oligonucleotide for construction of shRNA plasmid                            |
|---------------------|----------------------------|---------------------------------------------------------------------------------------------------|
| sh <i>Slc30a1-1</i> | V2LMM_43084                | tgctgtgacagtgagcgcctaagcaaatcgatatcaaatagtgaaagccacagatgtattgatatcgattgcttagggtgcctactgcctcgga    |
| sh <i>Slc30a1-2</i> | V3LMM_460121               | tgctgtgacagtgagcgcctcagtgatgtacaagtaaatagtgaaagccacagatgtattactgtacatccactgggtgcctactgcctcgga     |
| sh <i>Slc39a8</i>   | V2LMM_72473                | tgctgtgacagtgagcgcctgtcagtgacaattatcaaatagtgaaagccacagatgtattgataattgtcactgacaggatgcctactgcctcgga |
